# Supplementary material for: A fluorescent receptor for halide recognition: clues for the design of anion chemosensors
Source: Royal Society of Chemistry journal article supplement (doi:10.1039/c5cp00131e), 2015-01-01
Supplement: c5cp00131e1.pdf [file c5cp00131e1.pdf]

## Supplementary Information to: “A fluorescent receptor for halide recognition: clues for design of anion chemosensors”

Riccardo Chelli,<sup>a,b</sup> Giangaetano Pietrapperia,<sup>a,b</sup> Andrea Bencini,<sup>a</sup> Claudia Giorgi,<sup>a</sup>  
Vito Lippolis,<sup>c</sup> Pier R. Salvi,<sup>a</sup> and Cristina Gellini<sup>\*a,b</sup>

<sup>a</sup> *Dipartimento di Chimica, Università di Firenze, Via della Lastruccia 3, 50019 Sesto Fiorentino (FI), Italy.*

<sup>b</sup> *European Laboratory for Non-linear Spectroscopy (LENS), Via Nello Carrara 1, 50019 Sesto Fiorentino (FI), Italy.*

<sup>c</sup> *Dipartimento di Scienze Chimiche e Geologiche, Università di Cagliari, S.S. 554 Bivio per Sestu, 09042 Monserrato (CA), Italy.*

### Contents:

**Figure 1:** Graphical representations of  $S_0$  optimized geometries of **Fluoride-LH<sub>3</sub><sup>2+</sup>** complexes.

**Figure 2:** Graphical representations of  $S_0$  optimized geometries of **Chloride-LH<sub>3</sub><sup>2+</sup>** complexes.

**Figure 3:** Graphical representations of  $S_0$  optimized geometries of **Bromide-LH<sub>3</sub><sup>2+</sup>** complexes.

**Table 1:** Atomic Cartesian coordinates of  $S_0$  optimized geometries of **Fluoride-LH<sub>3</sub><sup>2+</sup>** complexes.

**Table 2:** Atomic Cartesian coordinates of  $S_0$  optimized geometries of **Chloride-LH<sub>3</sub><sup>2+</sup>** complexes.

**Table 3:** Atomic Cartesian coordinates of  $S_0$  optimized geometries of **Bromide-LH<sub>3</sub><sup>2+</sup>** complexes.

**Table 4:** Atomic Cartesian coordinates of  $S_0$  optimized geometries of **Fluoride-LH<sub>2</sub><sup>+</sup>** complexes.

**Table 5:** Atomic Cartesian coordinates of  $S_0$  optimized geometries of **Chloride-LH<sub>2</sub><sup>+</sup>** complexes.

**Table 6:** Atomic Cartesian coordinates of  $S_0$  optimized geometries of **Bromide-LH<sub>2</sub><sup>+</sup>** complexes.

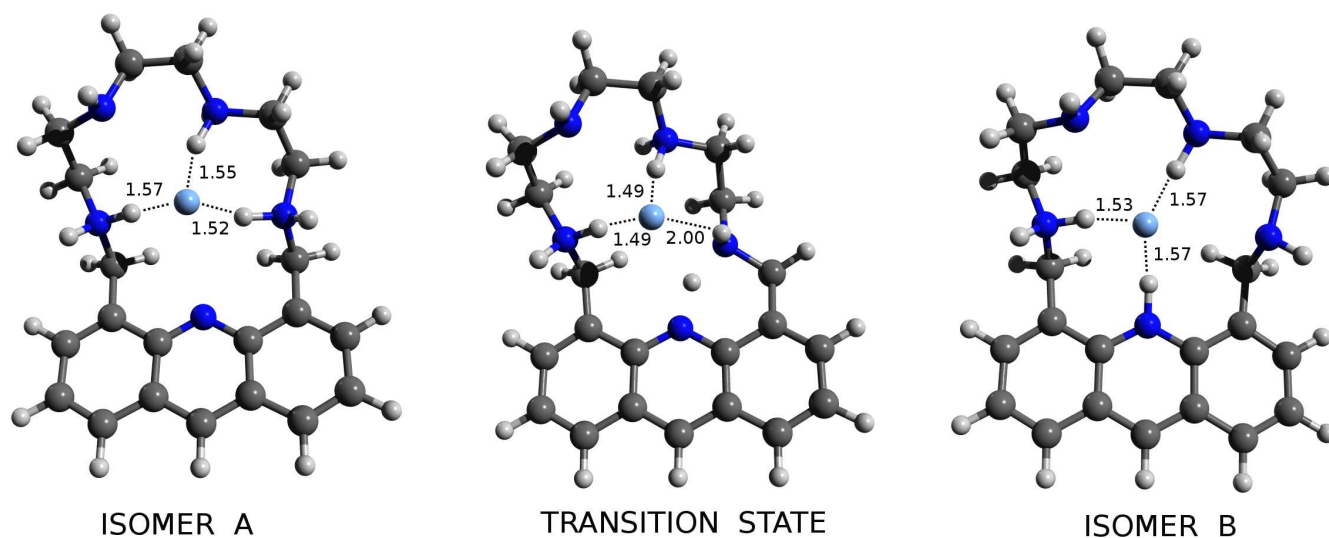

Figure 1: Graphical representations of  $S_0$  optimized geometries of **Fluoride-LH<sub>3</sub><sup>2+</sup>** complexes (Isomer A, Isomer B and Transition State). Calculations were performed by using DFT with B3-LYP exchange-correlation functional and 6-31++G(d,p) basis set. The shortest distances between the anion and the nitrogen atoms are displayed (in Å units). The atomic Cartesian coordinates are reported in Table 1 of this document.

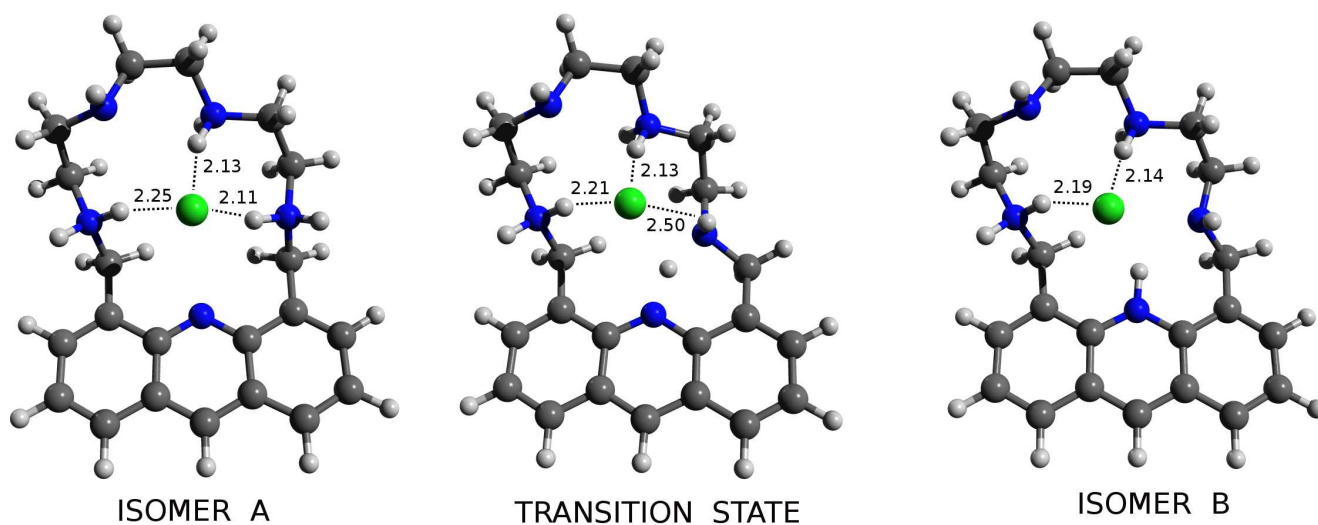

Figure 2: Graphical representations of  $S_0$  optimized geometries of **Chloride-LH<sub>3</sub><sup>2+</sup>** complexes (Isomer A, Isomer B and Transition State). Calculations were performed by using DFT with B3-LYP exchange-correlation functional and 6-31++G(d,p) basis set. The shortest distances between the anion and the nitrogen atoms are displayed (in Å units). The atomic Cartesian coordinates are reported in Table 2 of this document.

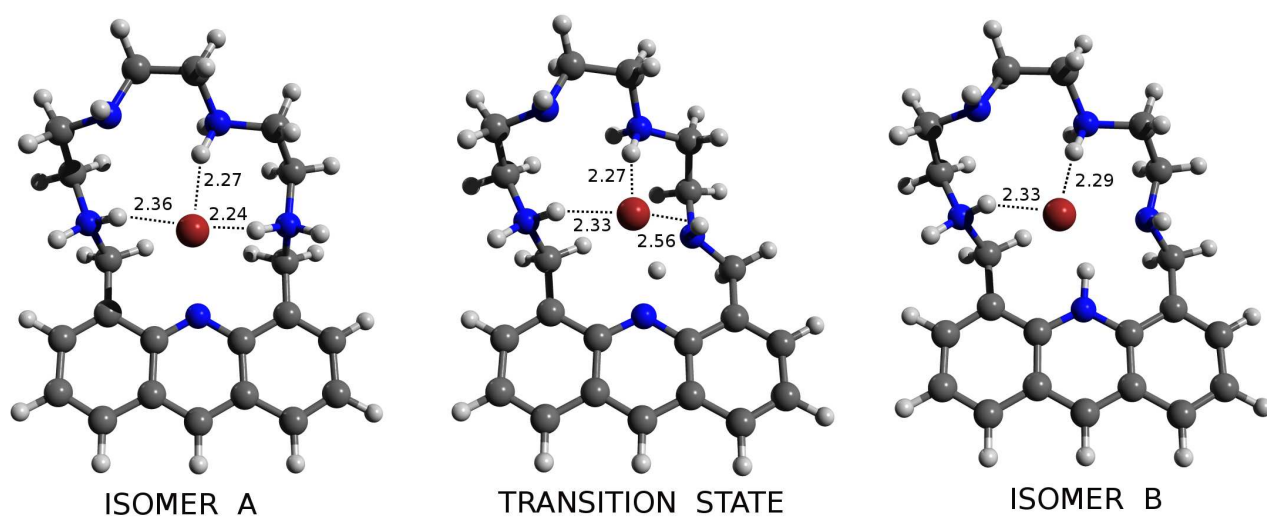

Figure 3: Graphical representations of  $S_0$  optimized geometries of **Bromide-LH<sub>3</sub><sup>2+</sup>** complexes (Isomer A, Isomer B and Transition State). Calculations were performed by using DFT with B3-LYP exchange-correlation functional and 6-31++G(d,p) basis set. The shortest distances between the anion and the nitrogen atoms are displayed (in Å units). The atomic Cartesian coordinates are reported in Table 3 of this document.

Table 1:  $S_0$  optimized geometries of **Fluoride-LH<sub>3</sub><sup>2+</sup>** complexes (Isomer A, Isomer B and Transition State). Calculations were performed by using DFT with B3-LYP exchange-correlation functional and 6-31++G(d,p) basis set. Atomic coordinates are in Å units.

| ISOMER A |           |           | ISOMER B  |   |           | TRANSITION STATE |           |   |           |           |           |
|----------|-----------|-----------|-----------|---|-----------|------------------|-----------|---|-----------|-----------|-----------|
| C        | 3.164740  | 1.722283  | -0.323980 | C | 3.186143  | 1.623259         | -0.339956 | C | 2.877767  | 1.950819  | -0.111091 |
| C        | 3.484177  | 3.095035  | -0.554199 | C | 3.662419  | 2.945677         | -0.574921 | C | 3.033154  | 3.367981  | -0.153089 |
| H        | 4.439093  | 3.339270  | -1.010804 | H | 4.674608  | 3.073918         | -0.944145 | H | 3.978318  | 3.773875  | -0.499520 |
| C        | 2.600548  | 4.079726  | -0.196651 | C | 2.853802  | 4.021684         | -0.321142 | C | 2.010366  | 4.187780  | 0.241115  |
| H        | 2.840884  | 5.125033  | -0.360076 | H | 3.202059  | 5.034534         | -0.488717 | H | 2.119404  | 5.266428  | 0.226589  |
| C        | 4.042937  | 0.687803  | -0.662317 | C | 4.004887  | 0.511505         | -0.558110 | C | 3.915611  | 1.113339  | -0.530218 |
| H        | 5.001370  | 0.921629  | -1.118773 | H | 5.015711  | 0.664924         | -0.924990 | H | 4.836413  | 1.555287  | -0.900437 |
| C        | 3.697374  | -0.643393 | -0.414626 | C | 3.566688  | -0.788083        | -0.297302 | C | 3.786274  | -0.274383 | -0.486785 |
| C        | 4.178369  | -3.023506 | -0.470214 | C | 3.976931  | -3.168453        | -0.185258 | C | 4.628336  | -2.513200 | -0.867739 |
| H        | 4.830766  | -3.855368 | -0.714087 | H | 4.624073  | -4.031628        | -0.295288 | H | 5.398035  | -3.194398 | -1.214018 |
| C        | 4.558436  | -1.735277 | -0.743291 | C | 4.431603  | -1.907880        | -0.468403 | C | 4.815400  | -1.157050 | -0.931630 |
| H        | 5.515894  | -1.522832 | -1.210176 | H | 5.446423  | -1.733493        | -0.810168 | H | 5.734243  | -0.731793 | -1.322444 |
| N        | 1.564695  | 0.086838  | 0.536678  | N | 1.413081  | 0.121353         | 0.292360  | N | 1.540105  | 0.004878  | 0.429933  |
| H        | 0.676513  | 4.535350  | 0.681383  | H | 0.959172  | 4.672742         | 0.469954  | H | -0.015479 | 4.275016  | 0.971927  |
| C        | 1.355446  | 3.734664  | 0.399363  | C | 1.559333  | 3.805403         | 0.210388  | C | 0.789035  | 3.611014  | 0.667772  |
| C        | 0.987472  | 2.425385  | 0.629738  | C | 1.031653  | 2.545504         | 0.446399  | C | 0.569319  | 2.245322  | 0.711121  |
| C        | 1.901258  | 1.364234  | 0.282447  | C | 1.846320  | 1.407741         | 0.134001  | C | 1.641393  | 1.358933  | 0.349397  |
| C        | -0.359653 | 2.134176  | 1.242998  | C | -0.321752 | 2.476834         | 1.120432  | C | -0.805656 | 1.787731  | 1.127662  |
| H        | -0.373288 | 1.171098  | 1.751515  | H | -0.414968 | 1.621778         | 1.791256  | H | -0.812001 | 0.778569  | 1.532402  |
| H        | -0.628761 | 2.921280  | 1.949022  | H | -0.468637 | 3.385172         | 1.705504  | H | -1.195011 | 2.456443  | 1.896777  |
| N        | -1.461994 | 2.089520  | 0.198123  | N | -1.464824 | 2.378341         | 0.141868  | N | -1.788984 | 1.821928  | -0.030262 |
| H        | -1.442593 | 1.131324  | -0.263916 | H | -1.495347 | 1.354908         | -0.155390 | H | -1.658635 | 0.911917  | -0.603378 |
| H        | -1.252162 | 2.777813  | -0.529832 | H | -1.272176 | 2.961712         | -0.676259 | H | -1.540690 | 2.599254  | -0.647554 |
| C        | -2.827605 | 2.382976  | 0.758865  | C | -2.799408 | 2.746439         | 0.718263  | C | -3.215228 | 2.006311  | 0.418621  |
| H        | -2.776966 | 3.362362  | 1.241032  | H | -2.745785 | 3.772728         | 1.088326  | H | -3.287167 | 2.997075  | 0.873837  |
| H        | -3.025043 | 1.634801  | 1.529456  | H | -2.970202 | 2.078471         | 1.565416  | H | -3.402358 | 1.271929  | 1.204982  |
| C        | -3.909388 | 2.393121  | -0.324849 | C | -3.890471 | 2.609368         | -0.344267 | C | -4.229537 | 1.878068  | -0.722312 |
| H        | -4.832557 | 2.763538  | 0.145420  | H | -4.842337 | 2.923864         | 0.110914  | H | -5.197644 | 2.214157  | -0.319004 |
| H        | -3.638559 | 3.126987  | -1.090962 | H | -3.686735 | 3.309701         | -1.160785 | H | -3.964154 | 2.580177  | -1.519055 |
| N        | -4.083005 | 1.091586  | -0.971623 | N | -3.933488 | 1.254445         | -0.899521 | N | -4.282197 | 0.535883  | -1.296251 |
| H        | -4.232283 | 1.209941  | -1.967646 | H | -4.218855 | 1.295611         | -1.873370 | H | -4.442652 | 0.574733  | -2.295184 |
| C        | -5.100249 | 0.200989  | -0.409520 | C | -4.797562 | 0.315514         | -0.180442 | C | -5.147624 | -0.458527 | -0.658210 |
| H        | -5.171434 | 0.378238  | 0.669601  | H | -4.634457 | 0.429051         | 0.897158  | H | -5.432778 | -0.106822 | 0.340790  |
| H        | -6.105156 | 0.375091  | -0.820825 | H | -5.867463 | 0.511678         | -0.353331 | H | -6.084960 | -0.617153 | -1.207043 |
| C        | -4.735164 | -1.263396 | -0.661638 | C | -4.521155 | -1.127495        | -0.593799 | C | -4.440941 | -1.815296 | -0.528667 |
| H        | -5.496098 | -1.938340 | -0.263424 | H | -5.343804 | -1.775855        | -0.284460 | H | -5.055827 | -2.527510 | 0.027093  |
| H        | -4.604447 | -1.462185 | -1.727746 | H | -4.408008 | -1.207470        | -1.677452 | H | -4.198782 | -2.237172 | -1.506377 |
| N        | -3.428010 | -1.573365 | 0.009691  | N | -3.267894 | -1.686526        | 0.024105  | N | -3.146642 | -1.615901 | 0.201873  |
| H        | -3.532643 | -1.394565 | 1.012208  | H | -3.400971 | -1.712954        | 1.039055  | H | -3.347238 | -1.057418 | 1.034348  |
| H        | -2.677822 | -0.904048 | -0.352054 | H | -2.429419 | -1.046941        | -0.121918 | H | -2.477979 | -1.046231 | -0.430779 |
| C        | -2.912108 | -2.969591 | -0.167325 | C | -2.966407 | -3.083561        | -0.446473 | C | -2.412806 | -2.838473 | 0.659247  |
| H        | -2.738759 | -3.127589 | -1.233688 | H | -2.788442 | -3.026609        | -1.522051 | H | -2.172623 | -3.437856 | -0.222193 |
| H        | -3.687244 | -3.663475 | 0.162787  | H | -3.864865 | -3.679623        | -0.266039 | H | -3.083792 | -3.416300 | 1.298325  |
| C        | -1.657631 | -3.221554 | 0.667684  | C | -1.769759 | -3.711824        | 0.266326  | C | -1.157700 | -2.472223 | 1.456962  |
| H        | -1.481397 | -4.296765 | 0.723833  | H | -1.816361 | -4.786724        | 0.056094  | H | -0.844839 | -3.376639 | 1.983931  |
| H        | -1.787661 | -2.850434 | 1.687396  | H | -1.893042 | -3.611629        | 1.352693  | H | -1.393384 | -1.730635 | 2.226884  |
| N        | -0.410053 | -2.585656 | 0.116927  | N | -0.476959 | -3.157409        | -0.161090 | N | -0.007780 | -1.985713 | 0.632352  |
| H        | -0.624171 | -1.587903 | -0.215561 | H | 0.041635  | -3.868700        | -0.666976 | H | -0.288985 | -1.934681 | -0.351963 |
| H        | -0.115057 | -3.105827 | -0.713860 | C | 0.358495  | -2.641420        | 0.936958  | C | 1.198330  | -2.837510 | 0.800380  |
| C        | 0.727075  | -2.582468 | 1.119740  | H | 0.471008  | -3.379098        | 1.748392  | H | 1.018637  | -3.852321 | 0.431223  |
| H        | 0.752595  | -3.573686 | 1.575483  | H | -0.138674 | -1.770179        | 1.366138  | H | 1.386437  | -2.904652 | 1.878547  |
| H        | 0.462044  | -1.841577 | 1.874424  | C | 2.210710  | -0.981423        | 0.143538  | C | 2.560972  | -0.809351 | 0.036702  |
| C        | 2.417143  | -0.897776 | 0.203683  | C | 1.749068  | -2.301730        | 0.437642  | C | 2.405176  | -2.229870 | 0.129007  |
| C        | 2.047732  | -2.265572 | 0.472195  | C | 2.648727  | -3.343092        | 0.277926  | C | 3.419559  | -3.039439 | -0.336201 |
| C        | 2.918518  | -3.281141 | 0.141906  | H | 2.320881  | -4.347083        | 0.534385  | H | 3.297357  | -4.117486 | -0.282055 |
| H        | 2.641916  | -4.310217 | 0.354936  | F | -1.159762 | -0.130040        | 0.007545  | F | -1.342269 | -0.432758 | -1.166839 |
| F        | -1.298331 | -0.346858 | -0.770411 | H | 0.371825  | -0.037668        | 0.353293  | H | 0.559842  | -0.770355 | 0.699112  |

Table 2:  $S_0$  optimized geometries of **Chloride-LH<sub>3</sub><sup>2+</sup>** complexes (Isomer A, Isomer B and Transition State). Calculations were performed by using DFT with B3-LYP exchange-correlation functional and 6-31++G(d,p) basis set. Atomic coordinates are in Å units.

| ISOMER A |           |           |           | ISOMER B |           |           |           | TRANSITION STATE |           |           |           |
|----------|-----------|-----------|-----------|----------|-----------|-----------|-----------|------------------|-----------|-----------|-----------|
| C        | -3.130542 | 1.817861  | 0.257415  | C        | -2.792291 | 2.089854  | 0.172777  | C                | -2.850912 | 2.013819  | 0.119956  |
| C        | -3.393071 | 3.198914  | 0.507439  | C        | -2.868940 | 3.504042  | 0.321593  | C                | -2.954346 | 3.432215  | 0.223554  |
| H        | -4.341369 | 3.476194  | 0.958657  | H        | -3.790772 | 3.937108  | 0.695131  | H                | -3.880570 | 3.855798  | 0.598447  |
| C        | -2.465544 | 4.151080  | 0.173488  | C        | -1.800244 | 4.290479  | -0.021835 | C                | -1.910538 | 4.232566  | -0.155118 |
| H        | -2.663385 | 5.203003  | 0.350351  | H        | -1.848744 | 5.369529  | 0.068231  | H                | -1.981479 | 5.312854  | -0.097779 |
| C        | -4.058953 | 0.818118  | 0.564966  | C        | -3.885821 | 1.273219  | 0.485218  | C                | -3.924644 | 1.203308  | 0.500286  |
| H        | -5.012494 | 1.086925  | 1.012258  | H        | -4.792327 | 1.732403  | 0.869104  | H                | -4.826377 | 1.666324  | 0.891170  |
| C        | -3.769792 | -0.522335 | 0.296802  | C        | -3.849338 | -0.109365 | 0.297664  | C                | -3.856868 | -0.183442 | 0.381739  |
| C        | -4.359456 | -2.879071 | 0.300389  | C        | -4.887658 | -2.293077 | 0.356359  | C                | -4.807923 | -2.399186 | 0.621336  |
| H        | -5.053205 | -3.684284 | 0.517759  | H        | -5.730606 | -2.942290 | 0.565571  | H                | -5.614607 | -3.061816 | 0.915402  |
| C        | -4.684543 | -1.579685 | 0.591416  | C        | -4.971745 | -0.943603 | 0.577410  | C                | -4.931763 | -1.041795 | 0.762552  |
| H        | -5.638932 | -1.332062 | 1.047150  | H        | -5.878413 | -0.486598 | 0.959233  | H                | -5.836334 | -0.596795 | 1.164526  |
| N        | -1.592651 | 0.127840  | -0.610177 | N        | -1.564794 | 0.119515  | -0.434991 | N                | -1.584336 | 0.038825  | -0.494965 |
| H        | -0.521669 | 4.541025  | -0.688499 | H        | 0.190924  | 4.330457  | -0.832425 | H                | 0.090436  | 4.279412  | -0.948485 |
| C        | -1.231501 | 3.762785  | -0.417857 | C        | -0.625438 | 3.682988  | -0.522464 | C                | -0.722962 | 3.630414  | -0.634564 |
| C        | -0.915417 | 2.441897  | -0.659334 | C        | -0.473556 | 2.310559  | -0.651477 | C                | -0.549598 | 2.260156  | -0.726859 |
| C        | -1.876421 | 1.414635  | -0.339430 | C        | -1.581325 | 1.479587  | -0.305833 | C                | -1.639685 | 1.393693  | -0.371325 |
| C        | 0.418435  | 2.098197  | -1.273218 | C        | 0.832619  | 1.800707  | -1.217318 | C                | 0.787339  | 1.777667  | -1.228300 |
| H        | 0.434572  | 1.078614  | -1.653791 | H        | 0.824696  | 0.741457  | -1.469511 | H                | 0.770519  | 0.740781  | -1.550083 |
| H        | 0.658560  | 2.792212  | -2.080439 | H        | 1.073591  | 2.351910  | -2.128142 | H                | 1.108391  | 2.385639  | -2.075405 |
| N        | 1.559543  | 2.209793  | -0.271165 | N        | 1.991340  | 2.012525  | -0.264479 | N                | 1.877771  | 1.918553  | -0.173492 |
| H        | 1.561727  | 1.367107  | 0.345691  | H        | 1.976567  | 1.251912  | 0.460390  | H                | 1.791115  | 1.139974  | 0.523856  |
| H        | 1.376367  | 3.001204  | 0.352813  | H        | 1.844432  | 2.880328  | 0.258516  | H                | 1.705989  | 2.774491  | 0.362478  |
| C        | 2.906128  | 2.404263  | -0.922233 | C        | 3.331115  | 2.084127  | -0.955691 | C                | 3.271210  | 1.991935  | -0.754934 |
| H        | 2.886074  | 3.382333  | -1.407771 | H        | 3.398776  | 3.060925  | -1.438354 | H                | 3.353132  | 2.954246  | -1.264616 |
| H        | 2.999888  | 1.638893  | -1.694559 | H        | 3.331897  | 1.317983  | -1.732782 | H                | 3.346209  | 1.205815  | -1.509323 |
| C        | 4.044975  | 2.322840  | 0.094211  | C        | 4.468336  | 1.865288  | 0.041524  | C                | 4.352381  | 1.841827  | 0.318498  |
| H        | 4.968014  | 2.618333  | -0.424541 | H        | 5.416075  | 2.003018  | -0.499594 | H                | 5.316429  | 2.060325  | -0.162317 |
| H        | 3.882616  | 3.063415  | 0.883536  | H        | 4.432964  | 2.636819  | 0.816535  | H                | 4.210319  | 2.604311  | 1.090437  |
| N        | 4.134583  | 0.994347  | 0.704275  | N        | 4.343424  | 0.556409  | 0.680578  | N                | 4.310611  | 0.522830  | 0.947313  |
| H        | 4.305193  | 1.071880  | 1.701204  | H        | 4.624655  | 0.603656  | 1.653847  | H                | 4.419986  | 0.589061  | 1.952070  |
| C        | 5.078058  | 0.054123  | 0.098074  | C        | 4.995258  | -0.567583 | 0.010260  | C                | 5.153881  | -0.535783 | 0.387981  |
| H        | 5.073875  | 0.199000  | -0.987962 | H        | 4.934025  | -0.420296 | -1.073900 | H                | 5.388951  | -0.290006 | -0.654056 |
| H        | 6.116554  | 0.197396  | 0.430577  | H        | 6.065356  | -0.655774 | 0.250731  | H                | 6.114112  | -0.646268 | 0.908464  |
| C        | 4.676903  | -1.386698 | 0.414539  | C        | 4.328916  | -1.891874 | 0.376275  | C                | 4.423680  | -1.885162 | 0.426673  |
| H        | 5.336519  | -2.099355 | -0.083421 | H        | 4.824916  | -2.721309 | -0.131573 | H                | 4.961231  | -2.646461 | -0.141755 |
| H        | 4.678661  | -1.584679 | 1.488623  | H        | 4.353044  | -2.072119 | 1.453396  | H                | 4.263556  | -2.240097 | 1.446189  |
| N        | 3.271608  | -1.628118 | -0.072775 | N        | 2.880078  | -1.904025 | -0.037275 | N                | 3.066977  | -1.689103 | -0.194685 |
| H        | 3.223652  | -1.357304 | -1.059100 | H        | 2.809403  | -1.583530 | -1.006370 | H                | 3.205502  | -1.128049 | -1.037207 |
| H        | 2.637222  | -0.982917 | 0.458824  | H        | 2.346600  | -1.218464 | 0.554292  | H                | 2.498179  | -1.120957 | 0.481927  |
| C        | 2.764424  | -3.035256 | 0.067099  | C        | 2.210901  | -3.247141 | 0.058541  | C                | 2.288898  | -2.907946 | -0.589391 |
| H        | 2.617088  | -3.231954 | 1.130500  | H        | 1.989634  | -3.421006 | 1.114018  | H                | 2.031722  | -3.451917 | 0.321885  |
| H        | 3.542165  | -3.703541 | -0.306108 | H        | 2.930518  | -3.996783 | -0.274044 | H                | 2.949700  | -3.533350 | -1.191849 |
| C        | 1.506665  | -3.276633 | -0.762516 | C        | 0.963566  | -3.339336 | -0.811610 | C                | 1.056108  | -2.556081 | -1.425072 |
| H        | 1.364041  | -4.351183 | -0.880688 | H        | 0.639839  | -4.392128 | -0.771449 | H                | 0.748593  | -3.483015 | -1.915954 |
| H        | 1.611510  | -2.843943 | -1.760051 | H        | 1.219512  | -3.132016 | -1.858250 | H                | 1.312592  | -1.853080 | -2.223713 |
| N        | 0.233100  | -2.725467 | -0.171234 | N        | -0.112131 | -2.427664 | -0.399686 | N                | -0.113647 | -2.026615 | -0.654665 |
| H        | 0.395799  | -1.815059 | 0.329658  | H        | -0.258238 | -2.526006 | 0.604876  | H                | 0.069939  | -2.100826 | 0.351448  |
| H        | -0.099561 | -3.363522 | 0.557498  | C        | -1.368237 | -2.746804 | -1.100753 | C                | -1.358081 | -2.772982 | -0.994766 |
| C        | -0.862321 | -2.563936 | -1.214524 | H        | -1.550863 | -3.830577 | -1.138852 | H                | -1.258546 | -3.830200 | -0.731643 |
| H        | -0.925862 | -3.516314 | -1.742756 | H        | -1.270353 | -2.407566 | -2.141267 | H                | -1.473599 | -2.707519 | -2.083069 |
| H        | -0.513218 | -1.788205 | -1.895655 | C        | -2.639142 | -0.693527 | -0.202602 | C                | -2.648803 | -0.743121 | -0.154351 |
| C        | -2.492449 | -0.822908 | -0.306292 | C        | -2.572038 | -2.093480 | -0.461529 | C                | -2.557925 | -2.161516 | -0.321161 |
| C        | -2.180823 | -2.202093 | -0.590295 | C        | -3.691225 | -2.851133 | -0.165909 | C                | -3.615472 | -2.950237 | 0.077655  |
| C        | -3.102322 | -3.182991 | -0.295112 | H        | -3.657000 | -3.919503 | -0.356696 | H                | -3.541424 | -4.027558 | -0.039678 |
| H        | -2.870128 | -4.219739 | -0.523540 | Cl       | 1.101442  | -0.131304 | 1.920340  | Cl               | 1.084565  | -0.427065 | 1.913780  |
| Cl       | 1.028932  | -0.346522 | 1.709480  | H        | -0.682314 | -0.380271 | -0.609072 | H                | -0.606777 | -0.784540 | -0.708508 |

Table 3:  $S_0$  optimized geometries of **Bromide-LH<sub>3</sub><sup>2+</sup>** complexes (Isomer A, Isomer B and Transition State). Calculations were performed by using DFT with B3-LYP exchange-correlation functional and 6-31++G(d,p) basis set. Atomic coordinates are in Å units.

| ISOMER A |           |           | ISOMER B  |    |           | TRANSITION STATE |           |    |           |           |           |
|----------|-----------|-----------|-----------|----|-----------|------------------|-----------|----|-----------|-----------|-----------|
| C        | -3.148758 | 1.860306  | 0.194115  | C  | -2.850327 | 2.091696         | 0.073738  | C  | -2.903439 | 2.024957  | 0.057547  |
| C        | -3.382251 | 3.241103  | 0.472182  | C  | -2.927482 | 3.504988         | 0.230452  | C  | -3.015239 | 3.440695  | 0.184353  |
| H        | -4.315569 | 3.526749  | 0.948605  | H  | -3.841570 | 3.933967         | 0.626899  | H  | -3.931628 | 3.850915  | 0.596431  |
| C        | -2.447552 | 4.183183  | 0.130171  | C  | -1.868124 | 4.295705         | -0.131299 | C  | -1.989440 | 4.254943  | -0.213081 |
| H        | -2.623155 | 5.235306  | 0.328064  | H  | -1.917431 | 5.374226         | -0.035238 | H  | -2.066339 | 5.333627  | -0.136345 |
| C        | -4.089950 | 0.872451  | 0.501617  | C  | -3.931711 | 1.269567         | 0.413225  | C  | -3.957641 | 1.200406  | 0.461502  |
| H        | -5.030707 | 1.151196  | 0.969375  | H  | -4.828962 | 1.723783         | 0.823875  | H  | -4.847047 | 1.650207  | 0.893873  |
| C        | -3.831984 | -0.467775 | 0.202688  | C  | -3.895841 | -0.111858        | 0.216994  | C  | -3.887568 | -0.182978 | 0.310551  |
| C        | -4.470652 | -2.811454 | 0.167178  | C  | -4.927351 | -2.298500        | 0.287034  | C  | -4.823823 | -2.407292 | 0.528050  |
| H        | -5.178063 | -3.606579 | 0.377548  | H  | -5.762401 | -2.951543        | 0.515234  | H  | -5.617175 | -3.080175 | 0.834848  |
| C        | -4.764040 | -1.512047 | 0.489860  | C  | -5.007436 | -0.951367        | 0.523214  | C  | -4.944764 | -1.054623 | 0.710369  |
| H        | -5.707182 | -1.253917 | 0.963010  | H  | -5.903701 | -0.499873        | 0.935022  | H  | -5.834834 | -0.623219 | 1.157121  |
| N        | -1.661224 | 0.158693  | -0.735535 | N  | -1.636250 | 0.129878         | -0.584539 | N  | -1.653404 | 0.071774  | -0.651737 |
| H        | -0.522628 | 4.556703  | -0.777418 | H  | 0.104787  | 4.345979         | -0.983323 | H  | -0.012609 | 4.331236  | -1.060591 |
| C        | -1.235011 | 3.783989  | -0.497092 | C  | -0.702027 | 3.693756         | -0.658669 | C  | -0.811760 | 3.669531  | -0.735878 |
| C        | -0.947217 | 2.462553  | -0.768231 | C  | -0.550376 | 2.322862         | -0.798191 | C  | -0.633793 | 2.302595  | -0.861194 |
| C        | -1.914277 | 1.445099  | -0.434241 | C  | -1.649210 | 1.487670         | -0.434919 | C  | -1.707408 | 1.422280  | -0.488692 |
| C        | 0.360743  | 2.105913  | -1.430885 | C  | 0.737297  | 1.814113         | -1.406733 | C  | 0.693389  | 1.836476  | -1.404012 |
| H        | 0.368017  | 1.070475  | -1.766526 | H  | 0.733825  | 0.746770         | -1.620886 | H  | 0.685200  | 0.794550  | -1.708729 |
| H        | 0.558359  | 2.765762  | -2.277760 | H  | 0.933560  | 2.338008         | -2.344200 | H  | 0.979506  | 2.437081  | -2.268958 |
| N        | 1.539697  | 2.267891  | -0.484935 | N  | 1.927788  | 2.069364         | -0.508019 | N  | 1.805778  | 2.010123  | -0.379944 |
| H        | 1.542675  | 1.466131  | 0.184849  | H  | 1.925903  | 1.345401         | 0.251264  | H  | 1.718892  | 1.254229  | 0.340791  |
| H        | 1.394762  | 3.103141  | 0.089453  | H  | 1.804393  | 2.964272         | -0.026705 | H  | 1.647526  | 2.883748  | 0.130707  |
| C        | 2.870401  | 2.384158  | -1.181613 | C  | 3.254619  | 2.084169         | -1.225728 | C  | 3.195070  | 2.047417  | -0.972336 |
| H        | 2.873878  | 3.339366  | -1.711035 | H  | 3.343637  | 3.044439         | -1.737265 | H  | 3.299169  | 3.005215  | -1.486305 |
| H        | 2.917367  | 1.579720  | -1.917653 | H  | 3.223675  | 1.294042         | -1.977781 | H  | 3.246687  | 1.255067  | -1.721998 |
| C        | 4.025119  | 2.299843  | -0.182524 | C  | 4.391072  | 1.857502         | -0.227902 | C  | 4.271368  | 1.869697  | 0.103524  |
| H        | 4.950989  | 2.534914  | -0.725467 | H  | 5.341675  | 1.949662         | -0.772222 | H  | 5.242718  | 2.056570  | -0.374300 |
| H        | 3.906225  | 3.078014  | 0.578114  | H  | 4.381619  | 2.650640         | 0.525865  | H  | 4.150797  | 2.639648  | 0.872000  |
| N        | 4.068494  | 0.991394  | 0.475091  | N  | 4.224198  | 0.567318         | 0.440261  | N  | 4.189482  | 0.551890  | 0.731899  |
| H        | 4.214035  | 1.094869  | 1.473638  | H  | 4.448075  | 0.635314         | 1.427158  | H  | 4.234613  | 0.615460  | 1.741802  |
| C        | 4.999066  | 0.007876  | -0.079182 | C  | 4.899746  | -0.577872        | -0.166857 | C  | 5.053658  | -0.515244 | 0.223402  |
| H        | 5.023631  | 0.121420  | -1.168910 | H  | 4.874859  | -0.467582        | -1.256806 | H  | 5.335263  | -0.280996 | -0.809397 |
| H        | 6.033262  | 0.134267  | 0.273267  | H  | 5.961256  | -0.654826        | 0.112949  | H  | 5.988898  | -0.624077 | 0.787887  |
| C        | 4.556592  | -1.413636 | 0.268700  | C  | 4.224699  | -1.891221        | 0.220392  | C  | 4.316322  | -1.861730 | 0.242155  |
| H        | 5.216618  | -2.152346 | -0.188962 | H  | 4.739699  | -2.734093        | -0.244347 | H  | 4.868356  | -2.627071 | -0.306242 |
| H        | 4.525752  | -1.581231 | 1.347426  | H  | 4.213365  | -2.037927        | 1.302779  | H  | 4.121017  | -2.214201 | 1.256527  |
| N        | 3.161294  | -1.644288 | -0.252386 | N  | 2.790477  | -1.920323        | -0.241107 | N  | 2.980462  | -1.657793 | -0.421297 |
| H        | 3.137818  | -1.378448 | -1.240831 | H  | 2.744893  | -1.595351        | -1.210426 | H  | 3.139947  | -1.075579 | -1.246028 |
| H        | 2.524377  | -0.989961 | 0.263070  | H  | 2.235708  | -1.244870        | 0.338466  | H  | 2.397445  | -1.103001 | 0.251930  |
| C        | 2.640196  | -3.047088 | -0.114816 | C  | 2.133892  | -3.270590        | -0.167058 | C  | 2.213805  | -2.868282 | -0.862866 |
| H        | 2.483735  | -3.240058 | 0.948206  | H  | 1.922133  | -3.466833        | 0.886709  | H  | 1.958758  | -3.447739 | 0.027095  |
| H        | 3.416397  | -3.721192 | -0.480236 | H  | 2.857039  | -4.007307        | -0.520309 | H  | 2.881258  | -3.464520 | -1.487497 |
| C        | 1.385224  | -3.279987 | -0.952362 | C  | 0.878749  | -3.351059        | -1.027119 | C  | 0.978962  | -2.493870 | -1.686481 |
| H        | 1.248938  | -4.352652 | -1.091795 | H  | 0.553379  | -4.403750        | -1.000318 | H  | 0.669499  | -3.406217 | -2.202813 |
| H        | 1.487418  | -2.827088 | -1.941143 | H  | 1.124032  | -3.126412        | -2.072682 | H  | 1.234492  | -1.768393 | -2.464861 |
| N        | 0.109617  | -2.747706 | -0.348514 | N  | -0.186462 | -2.441825        | -0.586308 | N  | -0.185164 | -1.984972 | -0.895660 |
| H        | 0.273585  | -1.856181 | 0.184098  | H  | -0.329617 | -2.567204        | 0.415756  | H  | 0.011274  | -2.071813 | 0.107761  |
| H        | -0.226723 | -3.409244 | 0.357450  | C  | -1.452820 | -2.725969        | -1.283522 | C  | -1.434162 | -2.728293 | -1.221705 |
| C        | -0.985520 | -2.539126 | -1.383459 | H  | -1.645709 | -3.806141        | -1.357492 | H  | -1.323007 | -3.791044 | -0.987532 |
| H        | -1.073057 | -3.477971 | -1.932016 | H  | -1.367328 | -2.349772        | -2.312227 | H  | -1.582556 | -2.634917 | -2.303929 |
| H        | -0.622947 | -1.756345 | -2.049077 | C  | -2.699535 | -0.688108        | -0.323741 | C  | -2.699024 | -0.723410 | -0.285688 |
| C        | -2.569568 | -0.781257 | -0.424684 | C  | -2.638529 | -2.085251        | -0.599286 | C  | -2.611312 | -2.137378 | -0.491428 |
| C        | -2.290575 | -2.161121 | -0.740160 | C  | -3.746114 | -2.848743        | -0.276741 | C  | -3.650805 | -2.939776 | -0.073317 |
| C        | -3.227878 | -3.128757 | -0.450996 | H  | -3.715505 | -3.914970        | -0.479373 | H  | -3.578056 | -4.013437 | -0.220836 |
| H        | -3.019799 | -4.165307 | -0.702394 | Br | 0.934948  | -0.077512        | 1.814308  | Br | 0.908207  | -0.371686 | 1.796361  |
| Br       | 0.871549  | -0.262765 | 1.639754  | H  | -0.755877 | -0.364941        | -0.776878 | H  | -0.679773 | -0.746015 | -0.916517 |

Table 4:  $S_0$  optimized geometries of **Fluoride-LH<sub>2</sub><sup>+</sup>** complexes (Isomer A, Isomer B and Transition State). Calculations were performed by using DFT with B3-LYP exchange-correlation functional and 6-31++G(d,p) basis set. Atomic coordinates are in Å units.

| ISOMER A |           |           | ISOMER B  |   |           | TRANSITION STATE |           |   |           |           |           |
|----------|-----------|-----------|-----------|---|-----------|------------------|-----------|---|-----------|-----------|-----------|
| C        | 3.197952  | 1.663673  | -0.306307 | C | -3.345168 | -1.411124        | -0.283706 | C | 2.935345  | 1.885891  | -0.038253 |
| C        | 3.543114  | 3.030109  | -0.539321 | C | -3.937002 | -2.688061        | -0.511597 | C | 3.123768  | 3.299963  | -0.046572 |
| H        | 4.499744  | 3.256277  | -1.001817 | H | -4.980667 | -2.732574        | -0.805463 | H | 4.084298  | 3.694103  | -0.363263 |
| C        | 2.678186  | 4.031968  | -0.182034 | C | -3.194375 | -3.827738        | -0.345227 | C | 2.106045  | 4.132701  | 0.337231  |
| H        | 2.938110  | 5.071845  | -0.350902 | H | -3.631237 | -4.805985        | -0.511935 | H | 2.240257  | 5.208786  | 0.342992  |
| C        | 4.043591  | 0.605487  | -0.656310 | C | -4.079245 | -0.226660        | -0.406200 | C | 3.944698  | 1.014404  | -0.463317 |
| H        | 5.004090  | 0.812970  | -1.121251 | H | -5.127443 | -0.281277        | -0.686899 | H | 4.888988  | 1.426323  | -0.808793 |
| C        | 3.658207  | -0.716984 | -0.416423 | C | -3.504912 | 1.023545         | -0.159194 | C | 3.754813  | -0.369691 | -0.468555 |
| C        | 4.046162  | -3.112450 | -0.510569 | C | -3.670156 | 3.428056         | 0.026693  | C | 4.470397  | -2.634761 | -0.934499 |
| H        | 4.663243  | -3.964838 | -0.775314 | H | -4.240632 | 4.350080         | -0.002874 | H | 5.203470  | -3.342950 | -1.305787 |
| C        | 4.473862  | -1.835975 | -0.769503 | C | -4.271640 | 2.223135         | -0.225923 | C | 4.736915  | -1.289539 | -0.942395 |
| H        | 5.433322  | -1.654366 | -1.245459 | H | -5.327915 | 2.155461         | -0.465027 | H | 5.680899  | -0.903289 | -1.313389 |
| N        | 1.568137  | 0.071895  | 0.577017  | N | -1.395508 | -0.084302        | 0.210283  | N | 1.532491  | -0.015289 | 0.448731  |
| H        | 0.756992  | 4.528337  | 0.685461  | H | -1.315104 | -4.647024        | 0.325147  | H | 0.054926  | 4.262300  | 0.999133  |
| C        | 1.424675  | 3.714503  | 0.414287  | C | -1.854690 | -3.729104        | 0.109094  | C | 0.854394  | 3.582282  | 0.717705  |
| C        | 1.036129  | 2.413567  | 0.653824  | C | -1.217385 | -2.520297        | 0.332388  | C | 0.605229  | 2.222383  | 0.736218  |
| C        | 1.932879  | 1.337324  | 0.312799  | C | -1.959714 | -1.317213        | 0.083307  | C | 1.674260  | 1.329892  | 0.390398  |
| C        | -0.317138 | 2.133921  | 1.258557  | C | 0.145194  | -2.547523        | 0.995025  | C | -0.790046 | 1.759408  | 1.083250  |
| H        | -0.320839 | 1.199158  | 1.818060  | H | 0.282399  | -1.697071        | 1.665395  | H | -0.816168 | 0.758651  | 1.512597  |
| H        | -0.605604 | 2.952849  | 1.919978  | H | 0.224650  | -3.459134        | 1.589156  | H | -1.219866 | 2.443221  | 1.818334  |
| N        | -1.399879 | 2.015097  | 0.204646  | N | 1.315283  | -2.527728        | 0.045903  | N | -1.703547 | 1.749225  | -0.120527 |
| H        | -1.294388 | 1.056025  | -0.298364 | H | 1.358036  | -1.518452        | -0.340232 | H | -1.471817 | 0.818399  | -0.736445 |
| H        | -1.240720 | 2.738393  | -0.501243 | H | 1.142439  | -3.169866        | -0.731266 | H | -1.467220 | 2.551287  | -0.709243 |
| C        | -2.783453 | 2.195043  | 0.768998  | C | 2.609198  | -2.886955        | 0.714295  | C | -3.146969 | 1.867763  | 0.281759  |
| H        | -2.757382 | 3.081281  | 1.408272  | H | 2.524116  | -3.907807        | 1.094988  | H | -3.253262 | 2.814513  | 0.819342  |
| H        | -2.991355 | 1.323286  | 1.393418  | H | 2.719942  | -2.209158        | 1.563683  | H | -3.350059 | 1.044586  | 0.969750  |
| C        | -3.855296 | 2.379033  | -0.309572 | C | 3.788294  | -2.767533        | -0.251396 | C | -4.128077 | 1.837974  | -0.892769 |
| H        | -4.739973 | 2.799281  | 0.197138  | H | 4.677477  | -3.156806        | 0.273265  | H | -5.061037 | 2.296684  | -0.520501 |
| H        | -3.519883 | 3.140793  | -1.022603 | H | 3.618438  | -3.425254        | -1.110927 | H | -3.762589 | 2.486487  | -1.696965 |
| N        | -4.154814 | 1.151435  | -1.042455 | N | 3.957263  | -1.399809        | -0.736444 | N | -4.346497 | 0.500700  | -1.442932 |
| H        | -4.426461 | 1.373474  | -1.993854 | H | 4.387547  | -1.417843        | -1.656568 | H | -4.714345 | 0.581600  | -2.383780 |
| C        | -5.152260 | 0.261776  | -0.423005 | C | 4.742892  | -0.522254        | 0.142814  | C | -5.193874 | -0.396120 | -0.634343 |
| H        | -5.180247 | 0.467398  | 0.652632  | H | 4.358955  | -0.612811        | 1.165120  | H | -5.462796 | 0.105709  | 0.303725  |
| H        | -6.163498 | 0.447940  | -0.814585 | H | 5.804285  | -0.823441        | 0.170896  | H | -6.133914 | -0.614869 | -1.157850 |
| C        | -4.787031 | -1.211413 | -0.615654 | C | 4.646431  | 0.941010         | -0.287749 | C | -4.493762 | -1.718451 | -0.295711 |
| H        | -5.562064 | -1.837123 | -0.153896 | H | 5.461672  | 1.500531         | 0.189281  | H | -5.129939 | -2.285185 | 0.396752  |
| H        | -4.780604 | -1.451195 | -1.696120 | H | 4.828743  | 0.998672         | -1.379496 | H | -4.391338 | -2.329908 | -1.211462 |
| N        | -3.502110 | -1.478473 | 0.026960  | N | 3.376598  | 1.564124         | 0.097351  | N | -3.204695 | -1.458177 | 0.344103  |
| H        | -2.811410 | -0.852403 | -0.393123 | H | 2.599960  | 0.976476         | -0.214886 | H | -2.600304 | -1.027899 | -0.359534 |
| C        | -3.032971 | -2.853930 | -0.095369 | C | 3.236323  | 2.908133         | -0.464890 | C | -2.544385 | -2.641064 | 0.891025  |
| H        | -2.847723 | -3.165849 | -1.140737 | H | 3.160167  | 2.892130         | -1.568837 | H | -2.338283 | -3.417286 | 0.128898  |
| H        | -3.806442 | -3.526658 | 0.294067  | H | 4.150831  | 3.467733         | -0.223574 | H | -3.210991 | -3.098976 | 1.632059  |
| C        | -1.784162 | -3.098047 | 0.748876  | C | 2.061085  | 3.712789         | 0.096352  | C | -1.242738 | -2.276342 | 1.606573  |
| H        | -1.605946 | -4.168208 | 0.877075  | H | 2.171195  | 4.737808         | -0.276541 | H | -0.912047 | -3.131207 | 2.202613  |
| H        | -1.910293 | -2.640121 | 1.732427  | H | 2.150970  | 3.759989         | 1.193197  | H | -1.433234 | -1.449233 | 2.298578  |
| N        | -0.525801 | -2.517534 | 0.153410  | N | 0.721576  | 3.229882         | -0.299406 | N | -0.128618 | -1.892287 | 0.685499  |
| H        | -0.275790 | -3.070880 | -0.670280 | H | 0.170418  | 4.026935         | -0.602031 | H | -0.485502 | -1.752549 | -0.268600 |
| C        | 0.628799  | -2.558921 | 1.127766  | C | -0.017555 | 2.537776         | 0.772678  | C | 1.006211  | -2.846492 | 0.702266  |
| H        | 0.626059  | -3.552401 | 1.580515  | H | 0.009644  | 3.115793         | 1.713291  | H | 0.738562  | -3.799660 | 0.232435  |
| H        | 0.407933  | -1.814830 | 1.893418  | H | 0.473174  | 1.586332         | 0.971966  | H | 1.227754  | -3.055221 | 1.755534  |
| C        | 2.379347  | -0.935889 | 0.218365  | C | -2.098636 | 1.083717         | 0.145946  | C | 2.503903  | -0.867793 | 0.029524  |
| C        | 1.956607  | -2.290756 | 0.469850  | C | -1.479071 | 2.349089         | 0.398763  | C | 2.256352  | -2.277456 | 0.062640  |
| C        | 2.783143  | -3.332928 | 0.111474  | C | -2.289676 | 3.470828         | 0.350316  | C | 3.229403  | -3.118509 | -0.434561 |
| H        | 2.469129  | -4.354624 | 0.307935  | H | -1.850107 | 4.435940         | 0.589157  | H | 3.049185  | -4.190023 | -0.434170 |
| F        | -1.065222 | -0.254805 | -0.929097 | F | 0.981053  | -0.108979        | -0.511457 | F | -1.058505 | -0.284347 | -1.378584 |
| H        | -0.691784 | -1.514179 | -0.220387 | H | -0.319063 | -0.035421        | 0.060565  | H | 0.557690  | -0.703136 | 0.734491  |

Table 5:  $S_0$  optimized geometries of **Chloride-LH<sub>2</sub><sup>+</sup>** complexes (Isomer A, Isomer B and Transition State). Calculations were performed by using DFT with B3-LYP exchange-correlation functional and 6-31++G(d,p) basis set. Atomic coordinates are in Å units.

| ISOMER A |           |           |           | ISOMER B |           |           |           | TRANSITION STATE |           |           |           |
|----------|-----------|-----------|-----------|----------|-----------|-----------|-----------|------------------|-----------|-----------|-----------|
| C        | -3.098239 | 1.826506  | 0.200963  | C        | -2.784448 | 2.053609  | 0.069371  | C                | -2.800256 | 2.041931  | 0.004735  |
| C        | -3.343784 | 3.214921  | 0.427572  | C        | -2.843695 | 3.475560  | 0.136911  | C                | -2.867494 | 3.466092  | 0.032454  |
| H        | -4.291915 | 3.512698  | 0.866051  | H        | -3.757871 | 3.941772  | 0.488978  | H                | -3.790131 | 3.935702  | 0.358366  |
| C        | -2.398478 | 4.148882  | 0.090919  | C        | -1.766284 | 4.227975  | -0.253517 | C                | -1.788285 | 4.215819  | -0.354331 |
| H        | -2.583514 | 5.205762  | 0.251865  | H        | -1.803921 | 5.310963  | -0.223711 | H                | -1.832351 | 5.299199  | -0.353128 |
| C        | -4.036804 | 0.840187  | 0.522931  | C        | -3.875484 | 1.259010  | 0.445562  | C                | -3.891057 | 1.261060  | 0.404716  |
| H        | -4.989509 | 1.125006  | 0.962228  | H        | -4.775264 | 1.741807  | 0.816245  | H                | -4.794331 | 1.752457  | 0.755552  |
| C        | -3.755542 | -0.507784 | 0.283921  | C        | -3.839846 | -0.133879 | 0.343969  | C                | -3.837065 | -0.133067 | 0.361882  |
| C        | -4.345976 | -2.863363 | 0.346178  | C        | -4.841859 | -2.325065 | 0.562147  | C                | -4.789202 | -2.333183 | 0.707891  |
| H        | -5.039562 | -3.662393 | 0.586288  | H        | -5.669307 | -2.970013 | 0.837096  | H                | -5.598352 | -2.978427 | 1.032798  |
| C        | -4.671290 | -1.557001 | 0.604645  | C        | -4.942159 | -0.965082 | 0.703444  | C                | -4.915621 | -0.969753 | 0.778791  |
| H        | -5.624915 | -1.298389 | 1.055986  | H        | -5.845790 | -0.500409 | 1.083510  | H                | -5.823065 | -0.506490 | 1.152562  |
| N        | -1.575434 | 0.109402  | -0.637245 | N        | -1.574057 | 0.052402  | -0.458324 | N                | -1.565803 | 0.028003  | -0.500684 |
| H        | -0.433955 | 4.499392  | -0.744063 | H        | 0.234503  | 4.204833  | -1.048304 | H                | 0.246689  | 4.180688  | -1.062824 |
| C        | -1.161034 | 3.735898  | -0.477462 | C        | -0.592555 | 3.583224  | -0.714815 | C                | -0.595369 | 3.564742  | -0.757596 |
| C        | -0.863249 | 2.407686  | -0.698594 | C        | -0.459686 | 2.205685  | -0.768292 | C                | -0.458172 | 2.188220  | -0.777063 |
| C        | -1.845348 | 1.401070  | -0.381656 | C        | -1.581415 | 1.410927  | -0.386050 | C                | -1.591026 | 1.380956  | -0.427060 |
| C        | 0.474158  | 2.025567  | -1.280298 | C        | 0.840065  | 1.625706  | -1.277323 | C                | 0.882628  | 1.620937  | -1.175750 |
| H        | 0.470634  | 1.003026  | -1.653260 | H        | 0.798660  | 0.556589  | -1.481792 | H                | 0.855971  | 0.567661  | -1.444023 |
| H        | 0.748360  | 2.706656  | -2.087813 | H        | 1.127341  | 2.125900  | -2.204195 | H                | 1.275014  | 2.171728  | -2.031848 |
| N        | 1.597100  | 2.113295  | -0.258365 | N        | 1.980565  | 1.831329  | -0.305340 | N                | 1.918958  | 1.760864  | -0.072604 |
| H        | 1.542477  | 1.293519  | 0.391817  | H        | 1.843460  | 1.188837  | 0.521156  | H                | 1.777356  | 1.001565  | 0.638911  |
| H        | 1.442645  | 2.934967  | 0.332969  | H        | 1.923376  | 2.776487  | 0.084502  | H                | 1.747858  | 2.632415  | 0.436704  |
| C        | 2.956674  | 2.228008  | -0.899340 | C        | 3.329199  | 1.662370  | -0.957809 | C                | 3.328303  | 1.786029  | -0.612584 |
| H        | 2.947332  | 3.147650  | -1.488554 | H        | 3.415393  | 2.450189  | -1.709572 | H                | 3.415547  | 2.696693  | -1.209137 |
| H        | 3.056262  | 1.378130  | -1.577555 | H        | 3.316125  | 0.689624  | -1.453822 | H                | 3.421216  | 0.915071  | -1.263541 |
| C        | 4.087226  | 2.254253  | 0.128506  | C        | 4.469745  | 1.740843  | 0.053728  | C                | 4.384612  | 1.755476  | 0.489292  |
| H        | 4.992489  | 2.593367  | -0.401270 | H        | 5.397431  | 1.882974  | -0.525603 | H                | 5.332248  | 2.068058  | 0.018348  |
| H        | 3.871910  | 3.011681  | 0.889913  | H        | 4.352286  | 2.633042  | 0.678450  | H                | 4.152378  | 2.506266  | 1.252486  |
| N        | 4.253530  | 0.959027  | 0.780987  | N        | 4.502172  | 0.562322  | 0.913227  | N                | 4.466931  | 0.446032  | 1.128813  |
| H        | 4.579998  | 1.084584  | 1.733322  | H        | 4.927011  | 0.792913  | 1.804056  | H                | 4.866604  | 0.539341  | 2.055456  |
| C        | 5.109229  | -0.003815 | 0.071410  | C        | 5.137618  | -0.631326 | 0.328472  | C                | 5.172401  | -0.592857 | 0.356958  |
| H        | 5.015434  | 0.179595  | -1.004135 | H        | 5.293914  | -0.462817 | -0.743461 | H                | 5.391487  | -0.207551 | -0.645962 |
| H        | 6.172728  | 0.119172  | 0.329617  | H        | 6.129374  | -0.803802 | 0.770112  | H                | 6.138626  | -0.836012 | 0.819399  |
| C        | 4.673289  | -1.443381 | 0.347240  | C        | 4.295662  | -1.897281 | 0.495178  | C                | 4.352374  | -1.878893 | 0.212391  |
| H        | 5.326865  | -2.124841 | -0.211064 | H        | 4.836956  | -2.726109 | 0.021934  | H                | 4.885711  | -2.552310 | -0.470011 |
| H        | 4.807340  | -1.674416 | 1.420146  | H        | 4.205750  | -2.146501 | 1.567465  | H                | 4.288931  | -2.394476 | 1.186775  |
| N        | 3.292084  | -1.632988 | -0.100788 | N        | 2.986425  | -1.770401 | -0.157443 | N                | 3.025041  | -1.595241 | -0.347333 |
| H        | 2.707225  | -1.008199 | 0.456118  | H        | 2.403575  | -1.170528 | 0.427530  | H                | 2.477199  | -1.163420 | 0.398785  |
| C        | 2.798644  | -3.002076 | 0.011368  | C        | 2.316734  | -3.060355 | -0.332247 | C                | 2.328417  | -2.788523 | -0.826714 |
| H        | 2.631466  | -3.331535 | 1.052209  | H        | 2.077037  | -3.549200 | 0.632005  | H                | 2.120055  | -3.521065 | -0.024122 |
| H        | 3.552348  | -3.677090 | -0.409471 | H        | 3.012230  | -3.730285 | -0.851033 | H                | 2.981742  | -3.294452 | -1.546824 |
| C        | 1.538337  | -3.217238 | -0.821802 | C        | 1.049715  | -2.996141 | -1.180899 | C                | 1.028555  | -2.470822 | -1.562374 |
| H        | 1.338926  | -4.281277 | -0.963444 | H        | 0.760902  | -4.035086 | -1.406166 | H                | 0.704742  | -3.379317 | -2.079366 |
| H        | 1.658507  | -2.742657 | -1.797355 | H        | 1.263385  | -2.501021 | -2.135360 | H                | 1.205548  | -1.704534 | -2.323759 |
| N        | 0.282487  | -2.638206 | -0.208446 | N        | -0.075143 | -2.294905 | -0.522211 | N                | -0.090209 | -2.019592 | -0.673887 |
| H        | 0.001464  | -3.226379 | 0.581369  | H        | -0.022672 | -2.459667 | 0.483501  | H                | 0.184412  | -2.095787 | 0.310645  |
| C        | -0.858675 | -2.579636 | -1.205843 | C        | -1.370267 | -2.795258 | -1.016037 | C                | -1.339556 | -2.792462 | -0.908769 |
| H        | -0.914446 | -3.568303 | -1.663714 | H        | -1.455368 | -3.886959 | -0.913306 | H                | -1.225084 | -3.833941 | -0.590907 |
| H        | -0.560020 | -1.848659 | -1.956918 | H        | -1.414360 | -2.577934 | -2.092426 | H                | -1.504541 | -2.795926 | -1.992884 |
| C        | -2.481358 | -0.827870 | -0.314926 | C        | -2.640750 | -0.739444 | -0.154048 | C                | -2.632444 | -0.731596 | -0.136294 |
| C        | -2.170484 | -2.211801 | -0.569614 | C        | -2.559799 | -2.149967 | -0.340394 | C                | -2.535614 | -2.155241 | -0.241102 |
| C        | -3.090118 | -3.184546 | -0.245007 | C        | -3.654859 | -2.904012 | 0.035649  | C                | -3.597030 | -2.917926 | 0.195600  |
| H        | -2.858731 | -4.226964 | -0.446612 | H        | -3.613770 | -3.981610 | -0.093104 | H                | -3.529819 | -4.000355 | 0.133121  |
| Cl       | 0.819714  | -0.229805 | 1.846759  | Cl       | 0.875779  | 0.185405  | 2.132266  | Cl               | 0.819779  | -0.334193 | 2.109480  |
| H        | 0.445566  | -1.697940 | 0.220761  | H        | -0.702150 | -0.493701 | -0.630582 | H                | -0.626922 | -0.763595 | -0.703310 |



Table 6:  $S_0$  optimized geometries of **Bromide-LH<sub>2</sub><sup>+</sup>** complexes (Isomer A, Isomer B and Transition State). Calculations were performed by using DFT with B3-LYP exchange-correlation functional and 6-31++G(d,p) basis set. Atomic coordinates are in Å units.

| ISOMER A |           |           |           | ISOMER B |           |           |           | TRANSITION STATE |           |           |           |
|----------|-----------|-----------|-----------|----------|-----------|-----------|-----------|------------------|-----------|-----------|-----------|
| C        | -3.113972 | 1.847507  | 0.108610  | C        | -2.792092 | 2.092637  | -0.067507 | C                | -2.785280 | 2.097636  | -0.082103 |
| C        | -3.354776 | 3.234008  | 0.351123  | C        | -2.824791 | 3.515347  | 0.000354  | C                | -2.815344 | 3.522344  | -0.032927 |
| H        | -4.291047 | 3.527768  | 0.816945  | H        | -3.727660 | 3.998639  | 0.358424  | H                | -3.719459 | 4.010759  | 0.316279  |
| C        | -2.419487 | 4.171429  | -0.003282 | C        | -1.732787 | 4.246965  | -0.388637 | C                | -1.720921 | 4.249385  | -0.420154 |
| H        | -2.600950 | 5.226962  | 0.170133  | H        | -1.749340 | 5.330488  | -0.357313 | H                | -1.735731 | 5.333403  | -0.400280 |
| C        | -4.041713 | 0.857724  | 0.450190  | C        | -3.892026 | 1.316540  | 0.321196  | C                | -3.890573 | 1.338318  | 0.319834  |
| H        | -4.981516 | 1.137646  | 0.919390  | H        | -4.779524 | 1.814465  | 0.701394  | H                | -4.774489 | 1.846330  | 0.695637  |
| C        | -3.767074 | -0.487660 | 0.189469  | C        | -3.877966 | -0.077342 | 0.226534  | C                | -3.875560 | -0.055453 | 0.245209  |
| C        | -4.361701 | -2.842586 | 0.240325  | C        | -4.906541 | -2.252833 | 0.472622  | C                | -4.884264 | -2.236079 | 0.553874  |
| H        | -5.048957 | -3.643207 | 0.493021  | H        | -5.736956 | -2.885042 | 0.767625  | H                | -5.705669 | -2.866223 | 0.877685  |
| C        | -4.673968 | -1.539047 | 0.527218  | C        | -4.984428 | -0.891170 | 0.611512  | C                | -4.969633 | -0.871947 | 0.661759  |
| H        | -5.611413 | -1.284033 | 1.013286  | H        | -5.873532 | -0.412236 | 1.007836  | H                | -5.856636 | -0.392816 | 1.063605  |
| N        | -1.623498 | 0.141010  | -0.804240 | N        | -1.633299 | 0.074520  | -0.637241 | N                | -1.622555 | 0.064069  | -0.669293 |
| H        | -0.471942 | 4.529128  | -0.873775 | H        | 0.273064  | 4.190409  | -1.165143 | H                | 0.302844  | 4.175440  | -1.153574 |
| C        | -1.194327 | 3.763154  | -0.601083 | C        | -0.567806 | 3.580994  | -0.843654 | C                | -0.550228 | 3.574032  | -0.848815 |
| C        | -0.903949 | 2.437359  | -0.843929 | C        | -0.463169 | 2.201822  | -0.902333 | C                | -0.453190 | 2.195550  | -0.899553 |
| C        | -1.879990 | 1.427995  | -0.515946 | C        | -1.606822 | 1.429561  | -0.537627 | C                | -1.604298 | 1.413519  | -0.552449 |
| C        | 0.424716  | 2.057044  | -1.447407 | C        | 0.823151  | 1.586277  | -1.406442 | C                | 0.859147  | 1.589249  | -1.337040 |
| H        | 0.426881  | 1.022909  | -1.786676 | H        | 0.781880  | 0.503470  | -1.515164 | H                | 0.815947  | 0.514275  | -1.489120 |
| H        | 0.674598  | 2.716276  | -2.280795 | H        | 1.085478  | 2.011673  | -2.377222 | H                | 1.196628  | 2.050580  | -2.267038 |
| N        | 1.562180  | 2.191797  | -0.448110 | N        | 1.987714  | 1.862059  | -0.482240 | N                | 1.959401  | 1.823213  | -0.319645 |
| H        | 1.515993  | 1.397327  | 0.230847  | H        | 1.899473  | 1.228895  | 0.350312  | H                | 1.839862  | 1.132941  | 0.459463  |
| H        | 1.412995  | 3.035498  | 0.112725  | H        | 1.912827  | 2.812250  | -0.109291 | H                | 1.831300  | 2.741906  | 0.112962  |
| C        | 2.918253  | 2.276261  | -1.098264 | C        | 3.327717  | 1.711400  | -1.154916 | C                | 3.341295  | 1.755147  | -0.919257 |
| H        | 2.926859  | 3.191986  | -1.693538 | H        | 3.419490  | 2.527794  | -1.874405 | H                | 3.446262  | 2.626131  | -1.569250 |
| H        | 2.998390  | 1.418929  | -1.769676 | H        | 3.302835  | 0.759335  | -1.688888 | H                | 3.369872  | 0.843752  | -1.519333 |
| C        | 4.044312  | 2.278645  | -0.064569 | C        | 4.459482  | 1.728599  | -0.130754 | C                | 4.424647  | 1.725580  | 0.155611  |
| H        | 4.964327  | 2.584596  | -0.588337 | H        | 5.402473  | 1.834757  | -0.691532 | H                | 5.381334  | 1.933429  | -0.352256 |
| H        | 3.846042  | 3.047805  | 0.689782  | H        | 4.371521  | 2.615948  | 0.505406  | H                | 4.266197  | 2.540217  | 0.870771  |
| N        | 4.161652  | 0.981807  | 0.596562  | N        | 4.412714  | 0.535410  | 0.708351  | N                | 4.419078  | 0.456550  | 0.877854  |
| H        | 4.459673  | 1.101822  | 1.558937  | H        | 4.801062  | 0.734049  | 1.623321  | H                | 4.813975  | 0.582667  | 1.802646  |
| C        | 5.019748  | 0.001787  | -0.085211 | C        | 5.035485  | -0.667621 | 0.129112  | C                | 5.071023  | -0.667771 | 0.181355  |
| H        | 4.937697  | 0.167318  | -1.164553 | H        | 5.190466  | -0.502004 | -0.942983 | H                | 5.309234  | -0.361139 | -0.843951 |
| H        | 6.081384  | 0.125160  | 0.182304  | H        | 6.026891  | -0.849589 | 0.568943  | H                | 6.023902  | -0.926074 | 0.663514  |
| C        | 4.577789  | -1.432797 | 0.207272  | C        | 4.180063  | -1.924633 | 0.295055  | C                | 4.193304  | -1.921369 | 0.113183  |
| H        | 5.238601  | -2.119794 | -0.335415 | H        | 4.718213  | -2.758841 | -0.172256 | H                | 4.713995  | -2.666305 | -0.501338 |
| H        | 4.702518  | -1.651682 | 1.283732  | H        | 4.081224  | -2.171510 | 1.366940  | H                | 4.083593  | -2.359762 | 1.120068  |
| N        | 3.202834  | -1.631629 | -0.255751 | N        | 2.875548  | -1.785796 | -0.365571 | N                | 2.892913  | -1.626773 | -0.503750 |
| H        | 2.599996  | -1.042586 | 0.321049  | H        | 2.284505  | -1.214469 | 0.240878  | H                | 2.318898  | -1.184467 | 0.216593  |
| C        | 2.735846  | -3.014562 | -0.214761 | C        | 2.213863  | -3.073417 | -0.585318 | C                | 2.200837  | -2.816644 | -1.000337 |
| H        | 2.564803  | -3.399016 | 0.806480  | H        | 1.978601  | -3.597289 | 0.361513  | H                | 1.974578  | -3.551702 | -0.204770 |
| H        | 3.507046  | -3.652702 | -0.660200 | H        | 2.909955  | -3.721534 | -1.130534 | H                | 2.864342  | -3.322891 | -1.710787 |
| C        | 1.485460  | -3.210382 | -1.069599 | C        | 0.942184  | -2.981974 | -1.425154 | C                | 0.914085  | -2.490019 | -1.755069 |
| H        | 1.314706  | -4.267517 | -1.282509 | H        | 0.634371  | -4.014223 | -1.654384 | H                | 0.583307  | -3.399120 | -2.266852 |
| H        | 1.597522  | -2.669290 | -2.010750 | H        | 1.158192  | -2.484977 | -2.378345 | H                | 1.106954  | -1.731839 | -2.520639 |
| N        | 0.216926  | -2.702642 | -0.422376 | N        | -0.164022 | -2.265472 | -0.751973 | N                | -0.203843 | -2.016431 | -0.878485 |
| H        | -0.068110 | -3.362739 | 0.306630  | H        | -0.069507 | -2.371993 | 0.258931  | H                | 0.058270  | -2.106163 | 0.108806  |
| C        | -0.921497 | -2.549415 | -1.412091 | C        | -1.476020 | -2.784705 | -1.173029 | C                | -1.472143 | -2.753086 | -1.125339 |
| H        | -1.006250 | -3.505170 | -1.931337 | H        | -1.555384 | -3.871664 | -1.024687 | H                | -1.381090 | -3.802882 | -0.828169 |
| H        | -0.605506 | -1.778550 | -2.114198 | H        | -1.564038 | -2.609814 | -2.254505 | H                | -1.642191 | -2.729946 | -2.208445 |
| C        | -2.514580 | -0.801103 | -0.456944 | C        | -2.700083 | -0.701063 | -0.299359 | C                | -2.699002 | -0.674265 | -0.293610 |
| C        | -2.216901 | -2.183228 | -0.740739 | C        | -2.640503 | -2.114372 | -0.476136 | C                | -2.643574 | -2.097856 | -0.431174 |
| C        | -3.127599 | -3.157983 | -0.397513 | C        | -3.736828 | -2.851083 | -0.070877 | C                | -3.717243 | -2.841272 | 0.008199  |
| H        | -2.906004 | -4.198327 | -0.620638 | H        | -3.711263 | -3.930357 | -0.189267 | H                | -3.680315 | -3.923497 | -0.078254 |
| Br       | 0.643542  | -0.214872 | 1.734682  | Br       | 0.693745  | 0.001086  | 1.925370  | Br               | 0.664159  | -0.267638 | 1.934548  |
| H        | 0.369501  | -1.803307 | 0.093447  | H        | -0.777485 | -0.489274 | -0.840679 | H                | -0.704750 | -0.754059 | -0.897082 |
